# Supplementary material for: A turn-on fluorescence assay of alkaline phosphatase activity using a DNA–silver nanocluster probe
Source: Royal Society of Chemistry journal article supplement (doi:10.1039/c7nj04894g), 2018-01-01
Supplement: c7nj04894g1.pdf [file c7nj04894g1.pdf]

## Supplementary Material

### **A turn-on fluorescence assay of alkaline phosphatase activity using a DNA-silver nanocluster probe**

**Changbei Ma <sup>a,\*</sup>, Haisheng Liu <sup>a</sup>, Kefeng Wu <sup>a</sup>, Mingjian Chen <sup>a</sup>, Hailun He <sup>a</sup>,  
Kemin Wang <sup>b</sup>, Kun Xia <sup>a,\*</sup>**

<sup>a</sup> School of Life Sciences, Central South University, Changsha 410013, China

<sup>b</sup> State Key Laboratory of Chemo/Biosensing and Chemometrics, Hunan University,  
Changsha 410081, China

\*Authors to whom correspondence should be addressed; E-mails:

macb2012@csu.edu.cn (C Ma), xiakun@sklmg.edu.cn (K Xia).

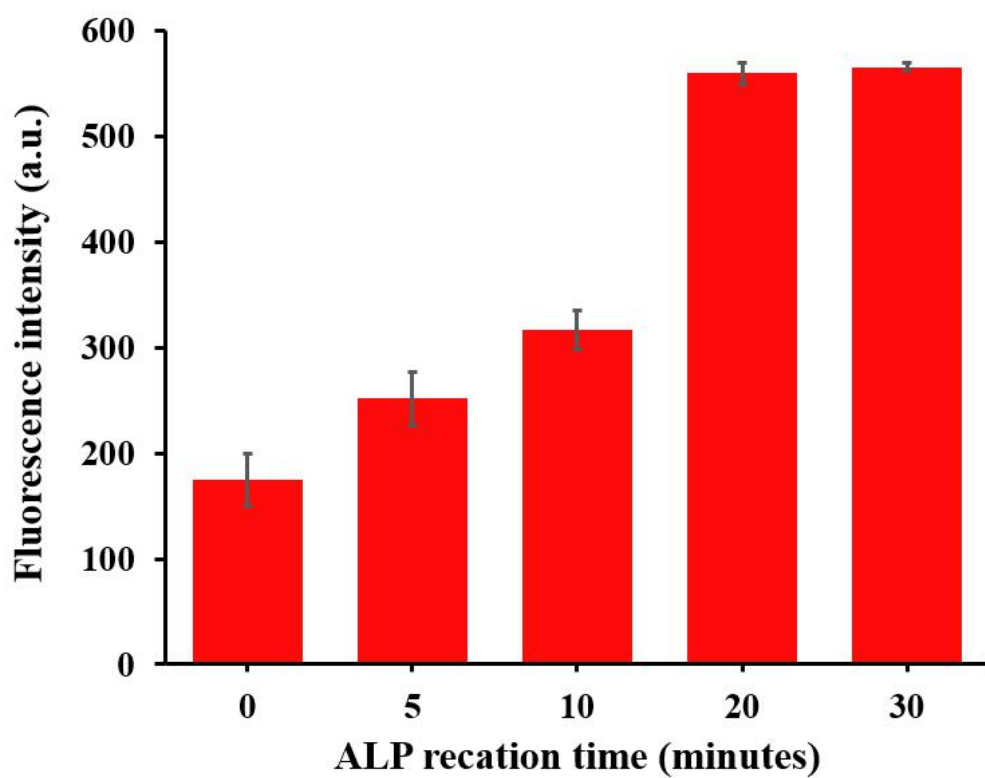

**Fig. S1** Optimization of the reaction of ALP (0, 5, 10, 20, 30 min).

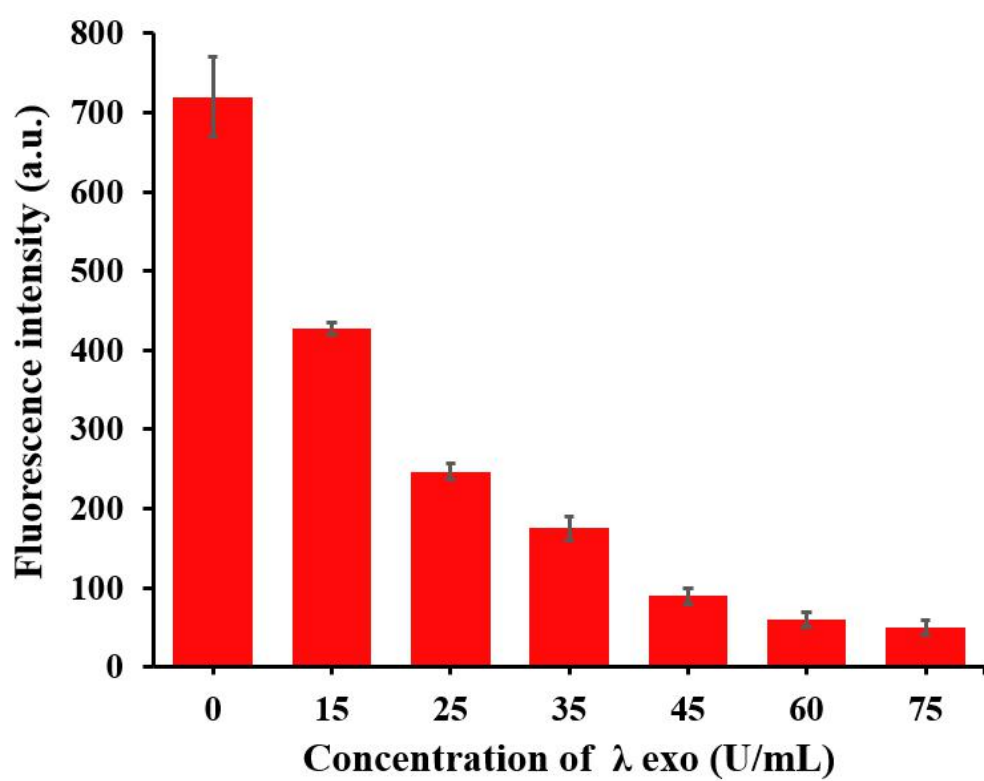

**Fig. S2** Optimization of the concentration of  $\lambda$  exo (0, 15, 25, 35, 45, 60, 75 U/mL).

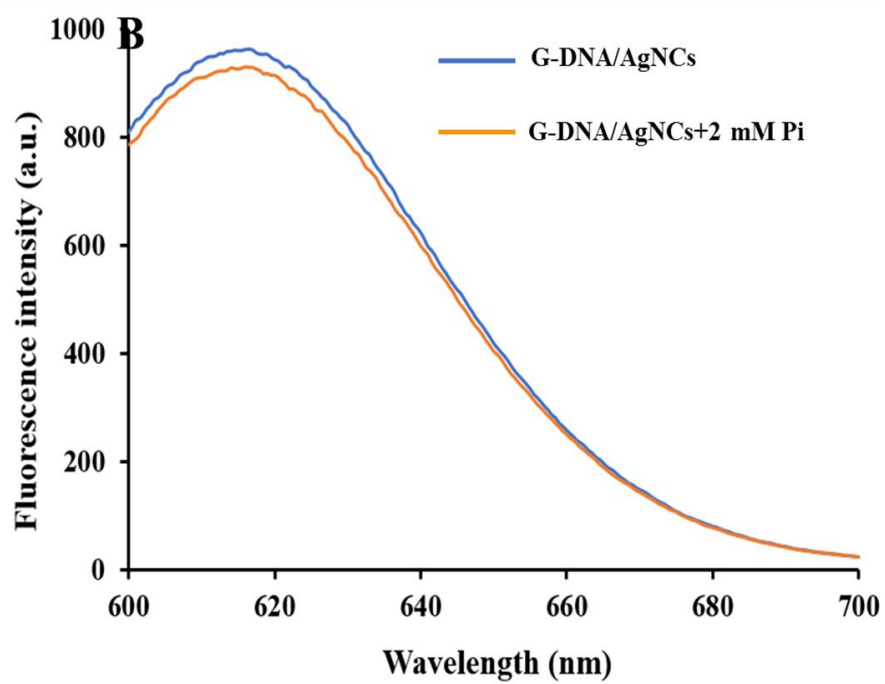

**Fig. S3** 2 mM Pi effect on the fluorescence of AgNCs.

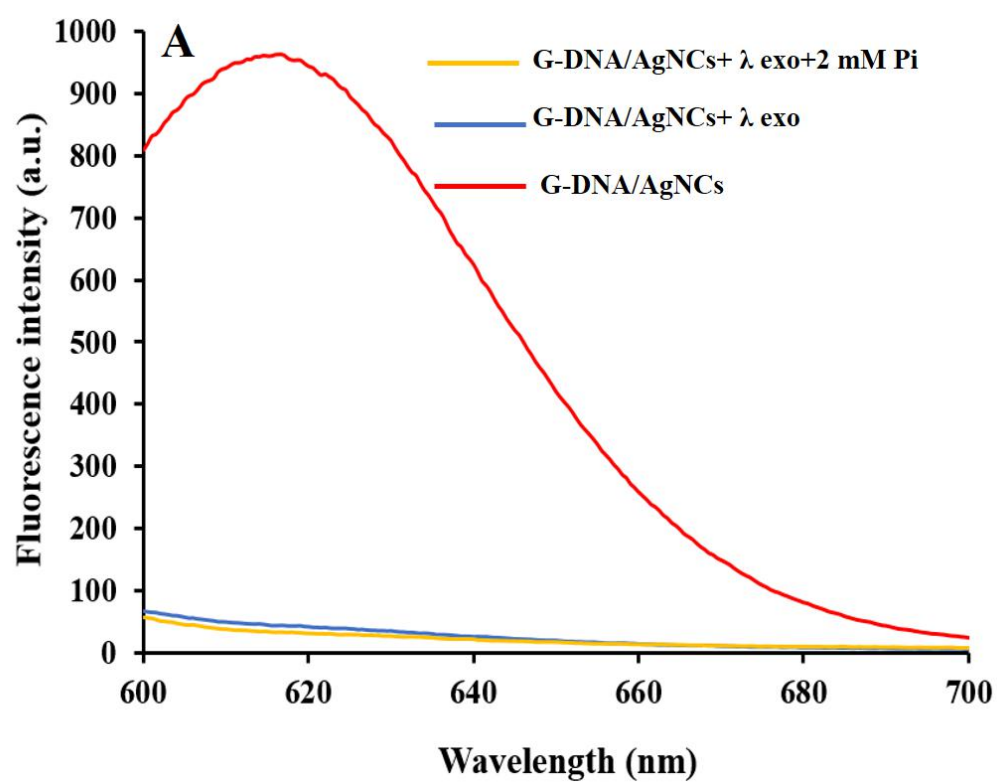

Fig. S4 2 mM Pi effect on the activity of  $\lambda$  exo.
